# Supplementary material for: Meso bromination and derivatization of synthetic bacteriochlorins
Source: Royal Society of Chemistry journal article supplement (doi:10.1039/d1nj05853c), 2022-01-01
Supplement: d1nj05853c1.pdf [file d1nj05853c1.pdf]

Electronic Supplementary Information for:

**Meso Bromination and Derivatization of Synthetic Bacteriochlorins**

Haoyu Jing, Sijia Liu, Jianbing Jiang, Vy-Phuong Tran, Jie Rong, Pengzhi Wang,  
and Jonathan S. Lindsey\*

Department of Chemistry  
North Carolina State University  
Raleigh, North Carolina 27695-8204

| Contents              | Pages |
|-----------------------|-------|
| X-ray structural data | S1–S8 |

**(1) X-ray structural data**

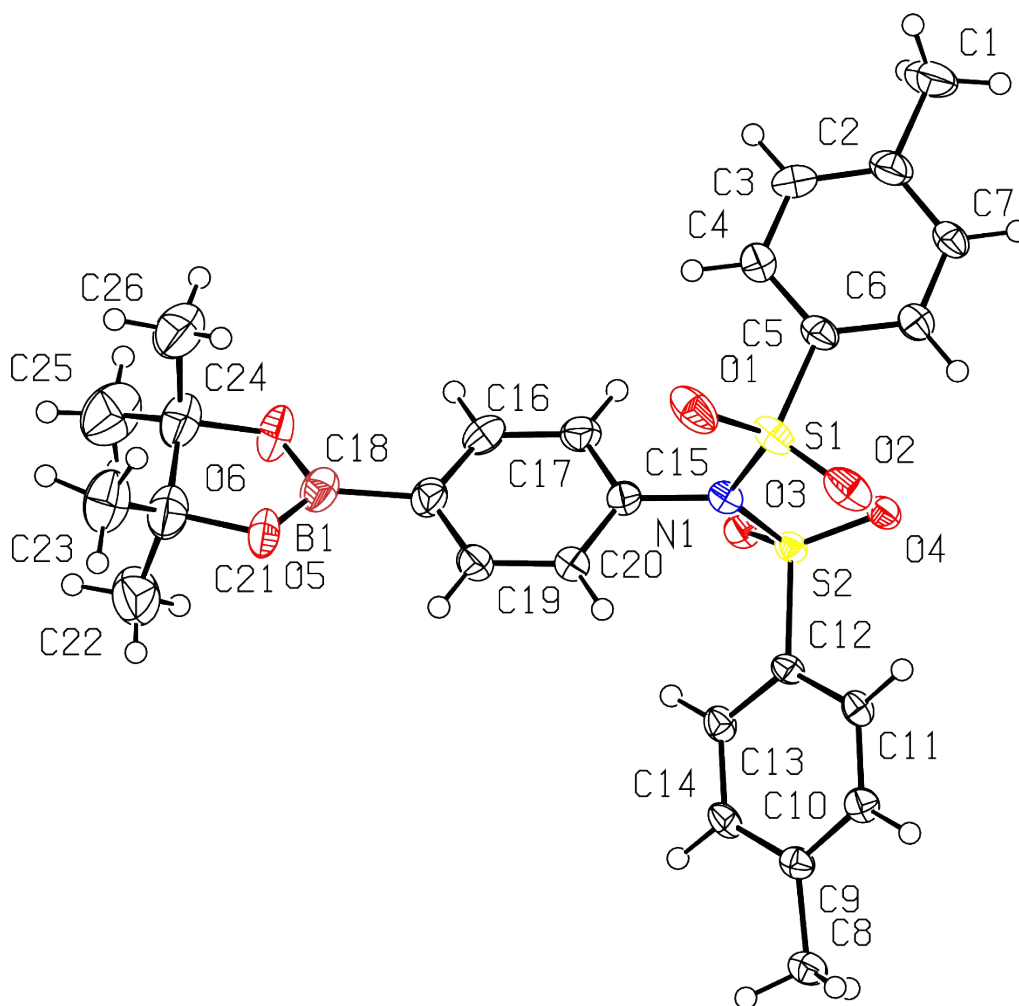

**Figure S1.** Single-crystal X-ray structure of **8**.

**Table S1. Summary of Crystal Data for 8.**

|                                                |                                                                 |
|------------------------------------------------|-----------------------------------------------------------------|
| CCDC registry                                  | 2125372                                                         |
| Chemical formula                               | C <sub>26</sub> H <sub>30</sub> BNO <sub>6</sub> S <sub>2</sub> |
| Formula weight (g/mol)                         | 527.44                                                          |
| Temperature (K)                                | 100.00                                                          |
| Wavelength (Å)                                 | 1.54178                                                         |
| Crystal size (mm)                              | 0.62 × 0.43 × 0.02                                              |
| Crystal habit                                  | Clear light colorless plate                                     |
| Crystal system                                 | Orthorhombic                                                    |
| Space group                                    | <i>Pbca</i>                                                     |
| Unit cell dimension, <i>a</i> (Å)              | 13.1157(3)                                                      |
| Unit cell dimension, <i>b</i> (Å)              | 13.2742(4)                                                      |
| Unit cell dimension, <i>c</i> (Å)              | 29.9769(8)                                                      |
| $\alpha$ , deg                                 | 90                                                              |
| $\beta$ , deg                                  | 90                                                              |
| $\gamma$ , deg                                 | 90                                                              |
| Volume (Å <sup>3</sup> )                       | 5219.0(2)                                                       |
| <i>Z</i>                                       | 8                                                               |
| Density (calculated) (g/cm <sup>3</sup> )      | 1.343                                                           |
| Absorption coefficient (mm <sup>-1</sup> )     | 2.197                                                           |
| F(000)                                         | 2224                                                            |
| Theta range for data collection, deg           | 4.479 to 66.589                                                 |
| Index ranges                                   | -15 ≤ <i>h</i> ≤ 15, -13 ≤ <i>k</i> ≤ 15, -35 ≤ <i>l</i> ≤ 35   |
| Reflections collected                          | 47668                                                           |
| Independent reflections                        | 4592 [R(int) = 0.055]                                           |
| <i>R</i> <sub>1</sub>                          | 0.0692                                                          |
| w <i>R</i> <sub>2</sub>                        | 0.1753                                                          |
| <i>R</i> <sub>1</sub> (all data)               | 0.0741                                                          |
| w <i>R</i> <sub>2</sub> (all data)             | 0.1782                                                          |
| Largest diff. peak and hole (eÅ <sup>3</sup> ) | 0.76 and -0.48                                                  |
| R.M.S. deviation from mean (eÅ <sup>3</sup> )  | 0.086                                                           |

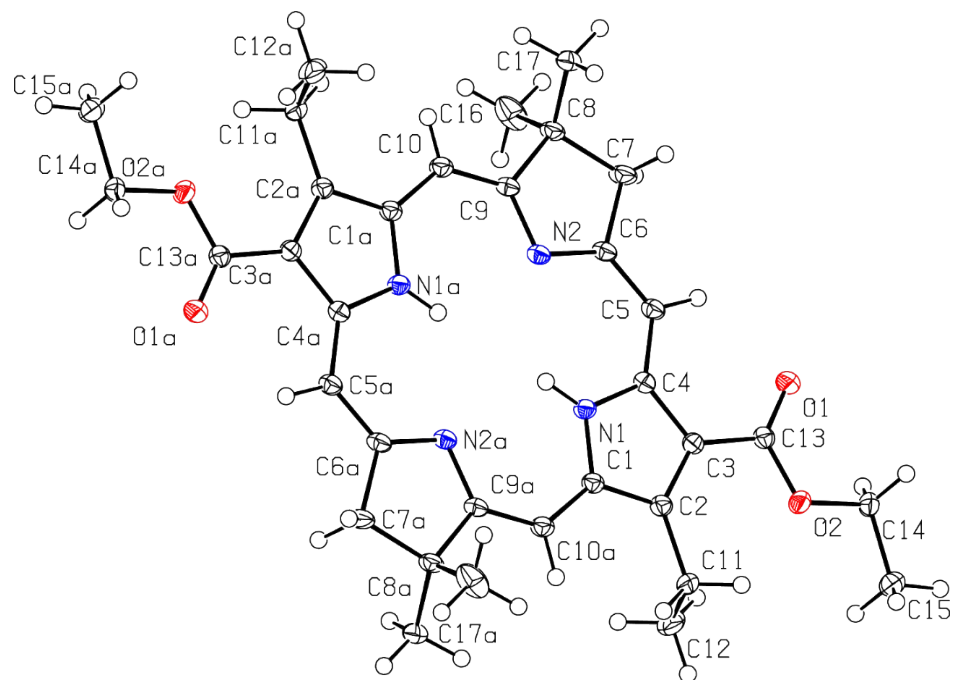

**Figure S2.** Single-crystal X-ray structure of BC-6.

**Table S2. Summary of Crystal Data for BC-6.**

|                                                |                                                               |
|------------------------------------------------|---------------------------------------------------------------|
| CCDC registry                                  | 2120236                                                       |
| Chemical formula                               | C <sub>34</sub> H <sub>42</sub> N <sub>4</sub> O <sub>4</sub> |
| Formula weight (g/mol)                         | 570.71                                                        |
| Temperature (K)                                | 110                                                           |
| Wavelength (Å)                                 | 0.71073                                                       |
| Crystal size (mm)                              | 0.42 × 0.25 × 0.15                                            |
| Crystal habit                                  | Purple block                                                  |
| Crystal system                                 | Triclinic                                                     |
| Space group                                    | <i>P</i> 1                                                    |
| Unit cell dimension, <i>a</i> (Å)              | 6.9814(3)                                                     |
| Unit cell dimension, <i>b</i> (Å)              | 9.7210(5)                                                     |
| Unit cell dimension, <i>c</i> (Å)              | 11.6464(5)                                                    |
| $\alpha$ , deg                                 | 75.978(3)                                                     |
| $\beta$ , deg                                  | 85.771(2)                                                     |
| $\gamma$ , deg                                 | 75.899(3)                                                     |
| Volume (Å <sup>3</sup> )                       | 743.65(6)                                                     |
| <i>Z</i>                                       | 1                                                             |
| Density (calculated) (g/cm <sup>3</sup> )      | 1.274                                                         |
| Absorption coefficient (mm <sup>-1</sup> )     | 0.084                                                         |
| F(000)                                         | 306                                                           |
| Theta range for data collection, deg           | 1.80 to 32.88                                                 |
| Index ranges                                   | -10 ≤ <i>h</i> ≤ 6, -14 ≤ <i>k</i> ≤ 14, -17 ≤ <i>l</i> ≤ 17  |
| Reflections collected                          | 20131                                                         |
| Independent reflections                        | 5461 [R(int) = 0.031]                                         |
| <i>R</i> <sub>1</sub>                          | 0.0440                                                        |
| w <i>R</i> <sub>2</sub>                        | 0.1027                                                        |
| <i>R</i> <sub>1</sub> (all data)               | 0.1093                                                        |
| w <i>R</i> <sub>2</sub> (all data)             | 0.1202                                                        |
| Largest diff. peak and hole (eÅ <sup>3</sup> ) | 0.44 and -0.29                                                |
| R.M.S. deviation from mean (eÅ <sup>3</sup> )  | 0.051                                                         |

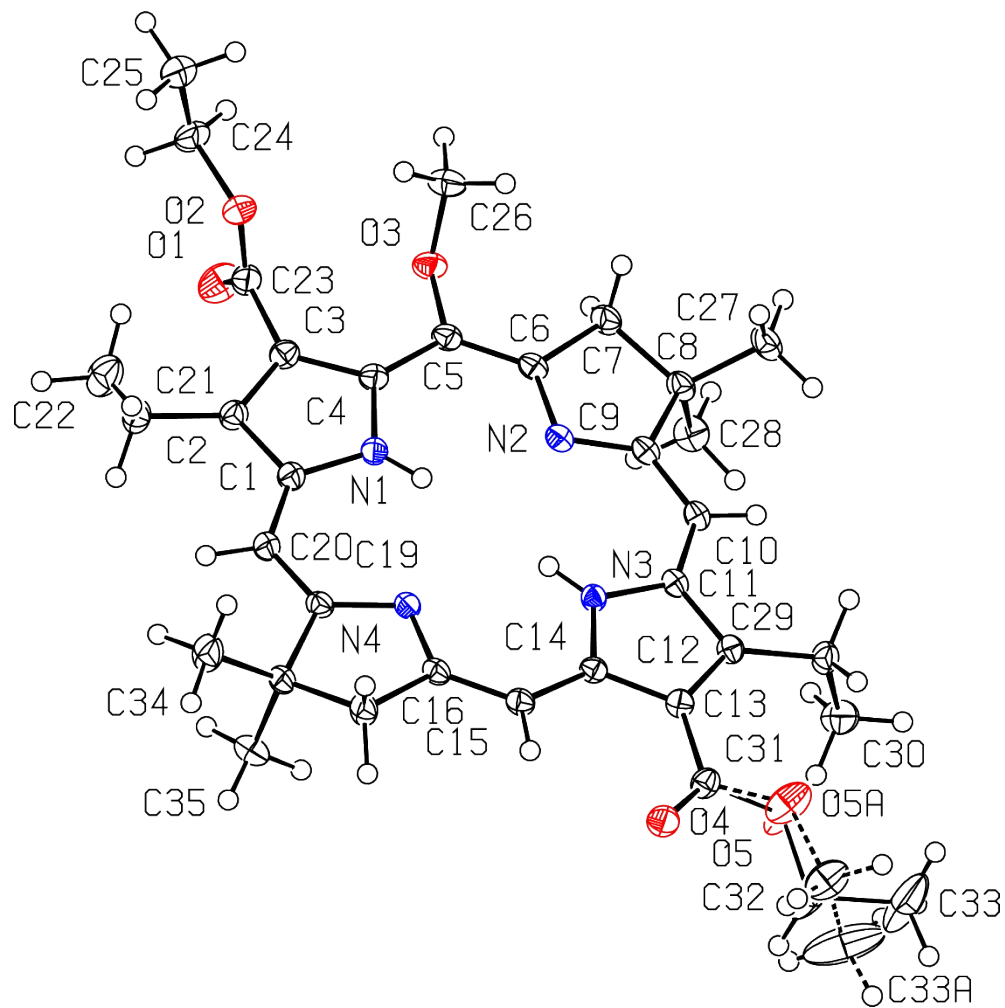

**Figure S3.** Single-crystal X-ray structure of **BC-7**.

**Table S3. Summary of Crystal Data for BC-7.**

|                                                |                                                               |
|------------------------------------------------|---------------------------------------------------------------|
| CCDC registry                                  | 2120266                                                       |
| Chemical formula                               | C <sub>35</sub> H <sub>44</sub> N <sub>4</sub> O <sub>5</sub> |
| Formula weight (g/mol)                         | 600.74                                                        |
| Temperature (K)                                | 110                                                           |
| Wavelength (Å)                                 | 0.71073                                                       |
| Crystal size (mm)                              | 0.60 × 0.33 × 0.23                                            |
| Crystal habit                                  | Dark green parallelapiped                                     |
| Crystal system                                 | Monoclinic                                                    |
| Space group                                    | <i>P</i> 2 <sub>1</sub> / <i>c</i>                            |
| Unit cell dimension, <i>a</i> (Å)              | 13.9883(3)                                                    |
| Unit cell dimension, <i>b</i> (Å)              | 11.3135(3)                                                    |
| Unit cell dimension, <i>c</i> (Å)              | 20.5010(5)                                                    |
| α, deg                                         | 90                                                            |
| β, deg                                         | 92.5280(10)                                                   |
| γ, deg                                         | 90                                                            |
| Volume (Å <sup>3</sup> )                       | 3241.26(14)                                                   |
| <i>Z</i>                                       | 4                                                             |
| Density (calculated) (g/cm <sup>3</sup> )      | 1.231                                                         |
| Absorption coefficient (mm <sup>-1</sup> )     | 0.072                                                         |
| F(000)                                         | 1288                                                          |
| Theta range for data collection, deg           | 1.99 to 30.51                                                 |
| Index ranges                                   | -19 ≤ <i>h</i> ≤ 19, -14 ≤ <i>k</i> ≤ 16, -29 ≤ <i>l</i> ≤ 25 |
| Reflections collected                          | 58352                                                         |
| Independent reflections                        | 9892 [R(int) = 0.038]                                         |
| R <sub>1</sub>                                 | 0.0479                                                        |
| wR <sub>2</sub>                                | 0.1173                                                        |
| R <sub>1</sub> (all data)                      | 0.0692                                                        |
| wR <sub>2</sub> (all data)                     | 0.1296                                                        |
| Largest diff. peak and hole (eÅ <sup>3</sup> ) | 0.45 and -0.25                                                |
| R.M.S. deviation from mean (eÅ <sup>3</sup> )  | 0.050                                                         |

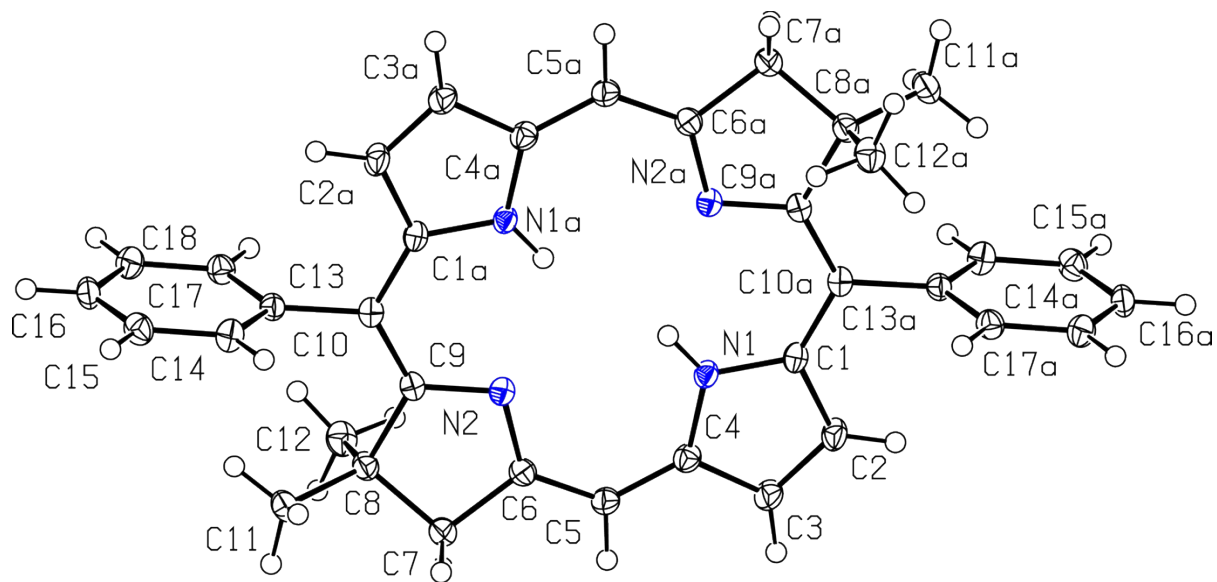

**Figure S4.** Single-crystal X-ray structure of **BC-8**.

**Table S3. Summary of Crystal Data for BC-8.**

|                                                |                                                             |
|------------------------------------------------|-------------------------------------------------------------|
| CCDC registry                                  | 2120133                                                     |
| Chemical formula                               | C <sub>36</sub> H <sub>34</sub> N <sub>4</sub>              |
| Formula weight (g/mol)                         | 522.67                                                      |
| Temperature (K)                                | 100                                                         |
| Wavelength (Å)                                 | 1.54178                                                     |
| Crystal size (mm)                              | 0.35 × 0.10 × 0.04                                          |
| Crystal habit                                  | Dark red plate                                              |
| Crystal system                                 | Triclinic                                                   |
| Space group                                    | <i>P</i> 1                                                  |
| Unit cell dimension, <i>a</i> (Å)              | 6.95760(10)                                                 |
| Unit cell dimension, <i>b</i> (Å)              | 8.7932(2)                                                   |
| Unit cell dimension, <i>c</i> (Å)              | 12.4732(2)                                                  |
| α, deg                                         | 106.0936(6)                                                 |
| β, deg                                         | 105.0837(6)                                                 |
| γ, deg                                         | 98.5367(6)                                                  |
| Volume (Å <sup>3</sup> )                       | 687.64(2)                                                   |
| <i>Z</i>                                       | 1                                                           |
| Density (calculated) (g/cm <sup>3</sup> )      | 1.262                                                       |
| Absorption coefficient (mm <sup>-1</sup> )     | 0.575                                                       |
| F(000)                                         | 278                                                         |
| Theta range for data collection, deg           | 3.89 to 72.10                                               |
| Index ranges                                   | -8 ≤ <i>h</i> ≤ 8, -10 ≤ <i>k</i> ≤ 10, -15 ≤ <i>l</i> ≤ 15 |
| Reflections collected                          | 18219                                                       |
| Independent reflections                        | 2709 [R(int) = 0.022]                                       |
| R <sub>1</sub>                                 | 0.0349                                                      |
| wR <sub>2</sub>                                | 0.0859                                                      |
| R <sub>1</sub> (all data)                      | 0.0357                                                      |
| wR <sub>2</sub> (all data)                     | 0.0865                                                      |
| Largest diff. peak and hole (eÅ <sup>3</sup> ) | 0.25 and -0.22                                              |
| R.M.S. deviation from mean (eÅ <sup>3</sup> )  | 0.039                                                       |
